# 1 Association between long-term air pollution exposure and DNA

## 2 methylation: the REGICOR study.

3 Sergi Sayols-Baixeras<sup>1,2,3</sup>, Alba Fernández-Sanlés<sup>1,2</sup>, Albert Prats<sup>1,4</sup>, Isaac Subirana<sup>5,1</sup>,

4 Michelle Plusquin<sup>6,7,8</sup>, Nino Künzli<sup>9</sup>, Jaume Marrugat<sup>10,3</sup>, Xavier Basagaña<sup>2,11,5</sup>, Roberto

5 Elosua<sup>1,3,12</sup>

6  
7 1.-Cardiovascular Epidemiology and Genetics Research Group, IMIM (Hospital del Mar  
8 Medical Research Institute), Dr Aiguader 88, 08003 Barcelona, Catalonia, Spain.

9 2.-Universitat Pompeu Fabra (UPF), Dr Aiguader 88, 08003 Barcelona, Catalonia, Spain.

10 3.-CIBER Cardiovascular Diseases (CIBERCV), Dr Aiguader 88, 08003 Barcelona,  
11 Catalonia, Spain.

12 4.-Preventive Medicine and Public Health Training Unit, Parc de Salut Mar-Universitat  
13 Pompeu Fabra-Agència de Salut Pública de Barcelona (UDMPiSP PSMar-UPF-ASPB), Dr  
14 Aiguader 88, 08003 Barcelona, Catalonia, Spain.

15 5.-CIBER Epidemiology and Public Health (CIBERESP), Dr Aiguader 88, 08003 Barcelona,  
16 Catalonia, Spain.

17 6.-Department of Epidemiology and Biostatistics, The School of Public Health, Imperial  
18 College London, Medical School Building, St Mary's Hospital, Norfolk Place, London W2  
19 1PG, United Kingdom.

20 7.-Medical Research Council-Health Protection Agency Centre for Environment and Health,  
21 Imperial College London, St Mary's Campus, Imperial College, Paddington, London W2  
22 1PG, United Kingdom.

23 8.-Centre for Environmental Sciences, Hasselt University, Campus Hasselt, Martelarenlaan  
24 42, BE3500 Hasselt, Belgium.

25 9.-Swiss Tropical and Public Health Institute, Socinstrasse 57, 4051 Basel, Switzerland.

26 10.-REGICOR Research Group, IMIM (Hospital del Mar Medical Research Institute), DR  
27 Aiguader 88, 08003 Barcelona, Catalonia, Spain.

28 11.- ISGlobal (Institute for Global Health), Dr Aiguader 88, 08003 Barcelona, Spain.

29 12.-Faculty of Medicine, University of Vic-Central University of Catalonia (UVic-UCC),  
30 Carretera de Roda 70, 08500 Vic, Catalonia, Spain.

31

32 **Author for correspondence:**

33 Roberto Elosua, MD, PhD

34 IMIM, Hospital del Mar Medical Research Institute

35 Dr Aiguader 88, 08003 Barcelona, Catalonia, Spain

36 Telephone: (+34) 933160800

37 Email: [relosua@imim.es](mailto:relosua@imim.es)

38 **ABSTRACT**

39 **Background:** Limited evidence suggests that epigenetic mechanisms may partially mediate  
40 the adverse effects of air pollution on health. Our aims were to identify new genomic loci  
41 showing differential DNA methylation associated with long-term exposure to air pollution  
42 and to replicate loci previously identified in other studies.

43 **Methods:** A two-stage epigenome-wide association study was designed: 630 individuals from  
44 the REGICOR study were included in the discovery and 454 participants of the EPIC-Italy  
45 study in the validation stage. DNA methylation was assessed using the Infinium  
46 HumanMethylation450 BeadChip. NOX, NO<sub>2</sub>, PM<sub>10</sub>, PM<sub>2.5</sub>, PM<sub>coarse</sub>, traffic intensity and  
47 traffic load exposure were measured according to the ESCAPE protocol. A systematic review  
48 was undertaken to identify those cytosine-phosphate-guanine (CpGs) associated with air  
49 pollution in previous studies and we screened for them in the discovery study.

50 **Results:** In the discovery stage of the epigenome-wide association study, 81 unique CpGs  
51 were associated with air pollution (p-value <10<sup>-5</sup>) but none of them were validated in the  
52 replication sample. Furthermore, we identified 12 CpGs in the systematic review showing  
53 differential methylation with a p-value fulfilling the Bonferroni criteria and 1642 CpGs  
54 fulfilling the false discovery rate criteria, all of which were related to PM<sub>2.5</sub> or NO<sub>2</sub>. None of  
55 them was replicated in the discovery study, in which the top hits were located in an intergenic  
56 region on chromosome 1 (cg10893043, p-value=6.79·10<sup>-5</sup>) and in the *PXK* and *ARSA* genes  
57 (cg16560256, p-value=2.23·10<sup>-04</sup>; cg11953250, p-value=3.64·10<sup>-04</sup>).

58 **Conclusions:** Neither new genomic loci associated with long-term air pollution were  
59 identified, nor previously identified loci were replicated. Continued efforts to test this  
60 potential association are warranted.

61

62 **Keywords:** Air pollution, DNA methylation, Epigenome-wide association study.

## 63 **BACKGROUND**

64 Exposure to air pollution remains a global threat with more than 90% of the world's  
65 population now exceeding the exposure limits proposed for particulate matter by the World  
66 Health Organization (WHO) (1). At the same time, a growing body of evidence consistently  
67 supports the adverse health effects of air pollution, which the same WHO report estimates to  
68 be related with 3 million premature deaths worldwide each year. However, the mechanisms  
69 by which air pollution induces these deleterious effects are not completely understood.  
70 Epigenetics encompasses mechanisms that regulate gene expression without changing the  
71 DNA sequence, and may contribute to the relation between air pollution and health. The most  
72 studied epigenetic mechanism is DNA methylation, which is heritable but can also be  
73 modified by life-style and environmental factors. Recently, several studies have analyzed the  
74 association between air pollution and DNA methylation using a genome-wide approach, and  
75 have reported numerous loci showing differential methylation related to this exposure (2–10).  
76 The aims of this study were both to identify new genomic loci showing differential  
77 methylation associated with long-term exposure to air pollution in a population-based study in  
78 Spain and to replicate loci previously reported in other studies.

79

## 80 **METHODS**

### 81 **Identification of new genomic loci showing differential methylation related to long-term** 82 **air pollution exposure (Aim 1)**

#### 83 *Study design and population*

84 We designed a cross-sectional epigenome-wide association study in two stages. We used the  
85 REGICOR (REGistre Gironí del COR) cohort as the discovery study and the Italy center of  
86 the European Prospective Investigation into Cancer and Nutrition (EPIC-Italy) as the

87 replication study, followed by a meta-analysis of the results observed in both studies  
88 (REGICOR + EPIC-Italy).

89 As previously described,(11) the REGICOR discovery sample included 648 participants  
90 randomly selected from the second wave of the REGICOR study in 2008-2013. The initial  
91 survey, performed during 2003-2005, included participants aged between 35 and 79 years, not  
92 institutionalized, and residing in Girona province (Catalonia, Spain) (11).

93 The EPIC-Italy replication study included 47,749 individuals in a multicenter prospective  
94 cohort recruited during 1993-1998 (12,13). The samples selected for the present study were  
95 from two case-control studies on breast cancer (14) and colorectal cancer in Varese and Turin.

96

#### 97 *HumanMethylation450 BeadChip*

98 DNA was extracted using standardized methods from peripheral blood (Puregen TM; Gentra  
99 Systems) and buffy coats (QIAGEN QIAasympyony DNA Midi Kit) in the REGICOR and  
100 EPIC-Italy studies, respectively. DNA was bisulphite-converted and the epigenome-wide  
101 methylation profiles were obtained using the Infinium HumanMethylation450 BeadChip  
102 (Illumina) (450K) to assess methylation on 485,577 cytosine-phosphate-guanine (CpGs)  
103 throughout the genome, following the Illumina Infinium HD Methylation protocol (15,16).  
104 The REGICOR samples were processed in two centers of the Spanish National Genotyping  
105 Center: the Center for Genomic Regulation in Barcelona (n=188 samples) and the Centro  
106 Nacional de Investigaciones Oncológicas in Madrid (n=460 samples). All the processed  
107 batches contained two duplicate samples used as an internal quality control. The EPIC-Italy  
108 samples were analyzed at the Human Genetics Foundation in Turin. The same well-defined  
109 pipeline was used in both studies to assess the quality control of the methylation data (17).

110 We used the M-value as the main DNA methylation measurement (Equation 1). An M-  
111 value=0 indicates that the CpG is half methylated, a positive M-value that the CpG is more

112 methylated than unmethylated, and a negative M-value the inverse result. We standardized the  
113 M-value by batch (Equation 2) to reduce the batch effect and other potential technical sources  
114 of variation.

115 Equation 1:  $M_{value} = \log_2 \left( \frac{M_i + \alpha}{U_i + \alpha} \right)$   $M_i$ = intensity of methylated probes.  
 $U_i$ = intensity of unmethylated probes.  
 $\alpha= 1$ .

116 Equation 2:  $Z = \frac{(X - \bar{X})}{\sqrt{\frac{\sum (X - \bar{X})^2}{(n-1)}}}$   $X$ = M-value for a specific individual.  
 $\bar{X}$ = mean of M-value for a specific batch.  
 $n$ = sample size.

117

### 118 *Air pollution exposure*

119 Both the REGICOR data and the Turin component of EPIC-Italy contained particulate matter  
120 exposure [aerodynamic diameter of <10 $\mu$ m (PM<sub>10</sub>), <2.5 $\mu$ m (PM<sub>2.5</sub>), and PM<sub>coarse</sub> (the  
121 difference between PM<sub>10</sub> and PM<sub>2.5</sub>)], nitrogen oxides (NO<sub>x</sub>) and nitrogen dioxide (NO<sub>2</sub>)  
122 measurements. For the Varese component of EPIC-Italy, only NO<sub>x</sub> and NO<sub>2</sub> were available.

123 Both studies used the ESCAPE protocol to assess long-term exposure to air pollution (18,19).

124 As previously described, address histories for the past 10 years were collected by  
125 questionnaire, and each address was geocoded at the front-door level (20). Using land use  
126 regression (LUR) models, 10-year weighted average exposure to NO<sub>x</sub> and to nitrogen dioxide  
127 NO<sub>2</sub> for each participant were estimated (21). The model's coefficient of determination for  
128 NO<sub>2</sub> was 0.63 for REGICOR and 70% for Turin, and for NO<sub>x</sub> was 66% and 72%, respectively  
129 (20).

130 PM<sub>10</sub>, PM<sub>2.5</sub> and PM<sub>coarse</sub> were also assessed using LUR models. The R<sup>2</sup> of the models for  
131 REGICOR and Turin was 71% and 69% for PM<sub>10</sub>, 51% and 59% for PM<sub>2.5</sub>, and 71% and 58%  
132 for PM<sub>coarse</sub>, respectively (19).

133 We also used traffic proximity markers as surrogates of air pollution exposure in independent  
134 analyses. For each address, we calculated the traffic intensity at the nearest street and the

135 traffic load (sum of traffic intensity multiplied by length of road segment) for all segments in  
136 a 100 meters buffer and derived 10-year average values for each participant.

137

### 138 *Other covariates*

139 REGICOR's trained team of nurses collected relevant sociodemographic, lifestyle, and  
140 cardiovascular risk factors using standardized and validated questionnaires (22,23). Smoking  
141 exposure was grouped in four categories: current smoker (smoked  $\geq 1$  cigarette/day at the time  
142 of the visit, on average, or gave up smoking within the year of the visit); former smoker, 1-5  
143 years (gave up smoking up to 5 years before the visit); former smokers  $>5$  years; and never  
144 smokers. The EPIC-Italy study collected the same variables, as well as the participating center  
145 and patient's diagnostic status.

146 We estimated cell concentration using Houseman algorithm by means of *minfi* R package  
147 (24,25). In both cohorts, we also calculated surrogate variables to control for potential  
148 residual confounding, using the *sva* R package (26). These variables identify and remove  
149 potential and non-measured sources of variation due to technical and biological confounders.

150

### 151 *Statistical analysis*

152 We assessed the association between air pollution and DNA methylation using robust linear  
153 regression model to reduce the effect of outliers. We used the differing air pollution exposures  
154 as independent variables and DNA methylation as the dependent variable. The models were  
155 adjusted for age, sex, smoking exposure, and cell composition (Model 1). Moreover, a second  
156 model adjusted for surrogate variables was also fitted (Model 2). In the REGICOR discovery  
157 study, we selected for validation those CpGs with a p-value of the association below an  
158 arbitrary threshold (p-value  $< 10^{-5}$ ) for each specific exposure. The results were replicated in  
159 the EPIC-Italy study using the same method and models, including also disease status and

160 study center as additional covariates. The results for each CpG were then meta-analyzed using  
161 a random effects model, applying Bonferroni criteria to declare a result as statistically  
162 significant ( $0.05/427,948$  CpGs;  $p\text{-value} < 1.17 \cdot 10^{-07}$ ).

163

## 164 **Replication of previously published CpGs associated with air pollution (Aim 2)**

165 We performed a systematic review to identify relevant epigenome-wide association studies  
166 indexed in Pubmed (<https://www.ncbi.nlm.nih.gov/pubmed/>) from its inception to March  
167 2018. We used the following search terms strategy: (methylati\* [Title/Abstract]) AND  
168 (epigenome-wide [Title/Abstract] OR genome-wide [Title/Abstract] OR 450K  
169 [Title/Abstract] OR 450 [Title/Abstract] OR HumanMethylation450 [Title/Abstract]) AND  
170 ("Air pollution" [Title/Abstract]). The articles identified were manually screened by 1  
171 reviewer (SS-B), focusing first on the title and abstract and then on the complete manuscripts  
172 to assess their appropriateness for inclusion in the review. The same author extracted the  
173 CpGs that were significantly associated with air pollution and replicated in at least one  
174 external population. In case of doubts the article was evaluated by a second reviewer (RE) to  
175 achieve a consensus. The identified CpGs were then screened in the selected REGICOR  
176 cohort.

177

## 178 *Statistical analysis*

179 The same analysis strategy and methodology described above was followed for the  
180 replication. We selected as distinctive the CpGs reported as statistically significant in the  
181 original studies, based on both Bonferroni corrected p-values and false discovery rate (FDR)  
182 p-values  $< 0.05$ . We considered as replicated those CpGs that fulfilled both the Bonferroni  
183 criteria according to the number of CpGs previously discovered and the FDR p-value.

184



185 **RESULTS**

186 **Identification of new genomic loci showing differential methylation related to air**  
187 **pollution (Aim 1)**

188 *Discovery Stage*

189 After applying the quality control of the 450K array, we excluded 3 individuals and 57,629  
190 CpG probes. Moreover, we removed those individuals without information on air pollution  
191 exposure (n=15). Finally, 630 individuals and 427,948 probes were included in the analysis.

192 The main sociodemographic and clinical characteristics and the air pollution exposures of the  
193 study participants are shown in Table 1. The Manhattan plots and q-q plots of the associations  
194 between air pollution exposures and DNA methylation are shown in Supplementary Figure 1.

195 We identified 81 unique CpGs associated with air pollution exposures with a p-value $<10^{-5}$ . In  
196 model 1, 6 CpGs were associated with PM<sub>10</sub>, 0 related to PM<sub>2.5</sub>, 5 to PM<sub>coarse</sub>, 2 to NO<sub>X</sub>, 4 to  
197 NO<sub>2</sub>, and 2 to traffic at the nearest street (Supplementary Table 1). In model 2, 7 CpGs were  
198 associated with PM<sub>10</sub>, 18 related to PM<sub>2.5</sub>, 6 to PM<sub>coarse</sub>, 28 to NO<sub>X</sub>, 32 to NO<sub>2</sub>, and 9 to traffic  
199 at the nearest street (Supplementary Table 2).

200

201 *Validation Stage and Meta-analysis*

202 After applying a similar quality control of the 450K array, we included all 81 CpGs selected  
203 for replication and we excluded 5 individuals. Moreover, we removed those individuals  
204 without information on confounder variables (n=15) and air pollution exposure (n=61).

205 Finally, 454 individuals were included in the analysis of NO traits (Turin and Varese) and 297  
206 in the analysis of PM traits (Turin). The main characteristics and air pollution exposures of  
207 the EPIC-Italy participants are shown in Table 1. The associations between air pollution and  
208 the selected CpGs in this analysis are shown in Supplementary Table 1 and 2.

209 The results of the meta-analysis of the REGICOR and the EPIC-Italy studies are shown in  
 210 Supplementary Table 1 and 2. None of the selected CpGs was validated in the joint analysis.  
 211  
 212 **Table 1:** Main characteristics of the participants included in the discovery and validation  
 213 studies.

|                                        | <b>REGICOR<br/>N=630</b> | <b>EPIC-Italy<br/>N=454</b> |
|----------------------------------------|--------------------------|-----------------------------|
| <b>Age, years</b>                      | 63.3 (11.7)              | 54.2 (7.1)                  |
| <b>Sex, female, n (%)</b>              | 323 (51.3)               | 323 (71)                    |
| <b>PM10, µg/m3</b>                     | 29.9 [27.5; 32.7]        | 46.91 [38.24; 53.23]        |
| <b>PMcoarse, µg/m3</b>                 | 14.1 [13.3; 15.7]        | 16.75 [10.88; 20.65]        |
| <b>PM2.5, µg/m3</b>                    | 15.0 [13.5; 15.9]        | 30.95 [26.74; 32.73]        |
| <b>PM2.5abs, µg/m3</b>                 | 2.40 [1.90; 2.91]        | 3.38 [2.34; 3.64]           |
| <b>NoX, µg/m3</b>                      | 61.7 [42.5; 72.8]        | 92.83 [34.46; 131.00]       |
| <b>NO2, µg/m3</b>                      | 36.9 [24.3; 42.6]        | 50.00 [22.26; 67.92]        |
| <b>Traffic near, µg/m3</b>             | 1725 [862; 7000]         | 4029 [0; 45012]             |
| <b>Total Cholesterol, mg/dL</b>        | 209 (36.6)               | 357 (136.2)                 |
| <b>LDL Cholesterol, mg/dL</b>          | 135 (32.4)               | -                           |
| <b>HDL Cholesterol, mg/dL</b>          | 53.1 (12.4)              | -                           |
| <b>Triglycerides, mg/dL</b>            | 89.0 [67.0;121]          | -                           |
| <b>SBP, mmHg</b>                       | 131 (18.2)               | 135.8 (19.4)                |
| <b>DBP, mmHg</b>                       | 76.0 (9.93)              | 84.3 (10.7)                 |
| <b>Hypertension, n (%)</b>             | 297 (47.3)               | 119 (26.2)                  |
| <b>Diabetes, n (%)</b>                 | 62 (9.89)                | 7 (1.54)                    |
| <b>Smoking status, n (%)</b>           |                          |                             |
| <b>Current smokers</b>                 | 105 (16.7)               | 234 (51.5)                  |
| <b>Former 1-5 years</b>                | 30 (4.76)                | -                           |
| <b>Former &gt;5 years</b>              | 159 (25.2)               | -                           |
| <b>Former</b>                          | -                        | 111 (24.4)                  |
| <b>Never smokers</b>                   | 336 (53.3)               | 109 (24.0)                  |
| <b>Cholesterol Treatment, n (%)</b>    | 151 (24.0)               | -                           |
| <b>Diabetes Treatment, n (%)</b>       | 43 (6.86)                | -                           |
| <b>Blood pressure treatment, n (%)</b> | 196 (31.3)               | -                           |
| <b>Breast cancer cases, n (%)</b>      | -                        | 82 (18.1)                   |
| <b>Colorectal cancer cases, n (%)</b>  | -                        | 133 (29.3)                  |
| <b>Controls, n (%)</b>                 | -                        | 239 (52.6)                  |

214

215

216

217 *Statistical power*

218 The regression coefficient values (effect size) that we could detect as statistically significant  
219 in the meta-analysis, accepting an alpha risk of  $1.17 \cdot 10^{-07}$  in a two-sided test and with an 80%  
220 power, are shown in Supplementary Table 1 and 2.

221

222 **Replication of the previously published CpGs associated with air pollution (Aim 2)**

223 We initially identified 19 manuscripts (2–10,27–36) based on the search terms and after  
224 reading the full manuscripts we finally selected 9 studies (2–10). We selected 12 CpGs  
225 showing differential methylation in relation to PM<sub>2.5</sub> from the only manuscript that corrected  
226 for Bonferroni criteria (9). Three of these CpGs could not be analyzed in the REGICOR study  
227 as they did not pass the quality control, and none of the others was replicated (Supplementary  
228 Table 3).

229 In a secondary analysis, we included 1,642 CpGs from two manuscripts (6,9) fulfilling a FDR  
230 p-value<0.05. Among all the selected FDR results, 195 CpGs could not be analyzed in our  
231 study as they did not pass the quality control. We did not replicate any of the 1,447 CpGs  
232 analyzed (Table 2 and Supplementary Table 3). In the REGICOR study, the top hits were  
233 located in an intergenic region on chromosome 1 (cg10893043, p-value= $6.79 \cdot 10^{-5}$ ) and in the  
234 *PXK* and *ARSA* genes (cg16560256, p-value= $2.23 \cdot 10^{-04}$ ; cg11953250, p-value= $3.64 \cdot 10^{-04}$ ) for  
235 PM<sub>2.5</sub>.

236

237 **Table 2:** Top hits of the replication of previously published Cps associated with NO<sub>2</sub> and  
238 PM<sub>25</sub> exposures.

| NO2        |            |           |          |             |          |          |
|------------|------------|-----------|----------|-------------|----------|----------|
| CpG        | Chromosome | Position  | Gene     | coefficient | SE       | P value  |
| cg24172570 | 7          | 27561178  | HIBADH   | 4.92E-04    | 1.91E-03 | 7.97E-01 |
| cg08973675 | 10         | 101380289 | SLC25A28 | -7.67E-04   | 2.74E-03 | 7.80E-01 |
| cg12283362 | 19         | 5709149   | LONP1    | -1.88E-04   | 2.15E-03 | 9.30E-01 |
| PM25       |            |           |          |             |          |          |

| CpG        | Chromosome | Position | Gene   | coefficient | SE       | P value  |
|------------|------------|----------|--------|-------------|----------|----------|
| cg10893043 | 1          | 51442760 | NA     | 4.30E-02    | 1.08E-02 | 6.79E-05 |
| cg16560256 | 3          | 58328580 | PXK    | -4.39E-02   | 1.19E-02 | 2.23E-04 |
| cg05088605 | 17         | 79987813 | LRRC45 | -4.15E-02   | 1.12E-02 | 2.15E-04 |

239

## 240 DISCUSSION

241 This population-based and cross-sectional study did not identify new loci or replicate loci  
242 previously identified as showing differential methylation related to long-term exposure to air  
243 pollution.

244 The lack of positive results in our study should be interpreted with caution and some  
245 methodological issues must be considered. First, our study is underpowered to detect small  
246 effect size associations. The statistical power of our study was estimated (Supplementary  
247 Table 1 and 2) and is similar to previous studies. Second, we defined strict criteria to consider  
248 an association as statistically significant based on the Bonferroni multiple comparisons  
249 correction. This approach is more conservative than the FDR p-value used in other studies  
250 (6,9). However, in the replication effort we also included those CpGs that were identified  
251 using the FDR criteria and we did not replicate any of these CpGs in our sample. Third, the  
252 exposure to air pollution and its variability is lower than that observed in other studies,  
253 limiting our capability to identify real associations. Fourth, the exposure assessment was  
254 estimated using land use regression models. Although this methodology is commonly used  
255 and we followed the ESCAPE protocol, (18,19) using validated exposure estimations, (21)  
256 some exposure misclassification could still be present, reducing the power to detect the  
257 association of interest in our study. Fifth, the replication was carried in a case-control study  
258 that may have a different methylation pattern. Finally, we estimated long-term exposure to air  
259 pollution whereas other studies have analyzed the association between short-term exposure  
260 and DNA methylation; however, in studies that analyzed several time exposures, the longer  
261 the exposure the higher the number of loci showing differential methylation (9).

262 Despite these limitations that should be considered, we would highlight some of the results  
263 observed in this study. In the discovery effort, we identified 7 CpGs associated with PM<sub>10</sub>, 18  
264 related to PM<sub>2.5</sub>, 6 with PM<sub>coarse</sub>, 28 with NO<sub>x</sub>, 32 with NO<sub>2</sub>, and 9 related to traffic at the  
265 nearest street in the REGICOR study. However, none of them were validated in the EPIC-  
266 Italy study. In our effort to replicate previous findings, we identified one locus located in an  
267 intergenic region on chromosome 1 (cg10893043, p-value=6.79·10<sup>-5</sup>) as potentially  
268 associated with PM<sub>2.5</sub>. The cg10893043 is close to the *CDKN2C* gene. The protein encoded  
269 by this gene is a member of the INK4 family of cyclin-dependent kinase inhibitors and  
270 regulates cell growth by controlling cell-cycle G1 progression (37). Some studies have shown  
271 that the expression of this gene inhibits the growth of human cells in animal models and have  
272 suggested a potential role in tumorigenesis (38).

273 Among the strengths of our study, we would mention the standardized methodology  
274 following the ESCAPE protocol that was consistently used to assess air pollution exposure.  
275 This methodology was validated in our population and was used to assess long-term air  
276 pollution exposure. Moreover, we applied a commonly used methodology to assess DNA  
277 methylation at the genome-wide level and a standardized methodology with both a discovery  
278 and an independent validation population.

279

## 280 **CONCLUSIONS**

281 The results of our study are negative as we did not identify any new genomic loci associated  
282 with long-term air pollution and we did not replicate any previously identified loci. However,  
283 these negative results should be interpreted with caution. New joint efforts, increasing the  
284 statistical power of the analysis and the variability of the exposure to air pollution, and  
285 considering both short- and long-term exposure, are warranted to assess the potential  
286 association between air pollution and DNA methylation.

287 **LIST OF ABBREVIATIONS**

288 WHO: World Health Organization.

289 REGICOR: REgistre GIroní del COR.

290 EPIC-Italy: The Italy center of European Prospective Investigation into Cancer and Nutrition.

291 450K: Infinium Human Methylation450 BeadChip.

292 CpG: Cytosine-phosphate-guanine.

293 PM<sub>10</sub>: Particulate matter with an aerodynamic diameter of <10µm.

294 PM<sub>2.5</sub>: Particulate matter with an aerodynamic diameter of <2.5µm.

295 PM<sub>coarse</sub>: The difference between PM<sub>10</sub> and PM<sub>2.5</sub>.

296 NO<sub>x</sub>: Nitrogen oxides.

297 NO<sub>2</sub>: Nitrogen dioxide

298 LUR: Land use regression.

299 FDR: False Discovery Rate.

300

301 **DECLARATIONS**

302 **Ethics approval and consent to participate**

303 All participants in both studies (REGICOR and EPIC-Italy) signed an informed consent; the

304 studies were approved by the local ethic committees (PSMAR CEIC- 2012/4729/I) and

305 followed national legislation and the Declaration of Helsinki criteria.

306

307 **Consent for publication**

308 Not applicable.

309

310 **Availability of data and material**

311 The datasets used and/or analyzed during the current study are available from the  
312 corresponding author [RE] on reasonable request.

313

### 314 **Competing interests**

315 The authors declare that they have no competing interests.

316

### 317 **Funding**

318 This work was supported by grants from the Catalan Agència de Gestió d'Ajuts Universitaris  
319 de Recerca (2014-SGR-240) and the Spanish Ministry of Economy through the Instituto de  
320 Salud Carlos III-FEDER (FIS PI15/00051, PI12/00232, CIBERCV, CIBERESP, Red de  
321 Investigación Cardiovascular RD12/0042). S.S-B. was funded by contracts from Instituto de  
322 Salud Carlos III-FEDER (IFI14/00007). A.F-S. was funded by the Spanish Ministry of  
323 Economy and Competitiveness (BES-2014-069718).

324

### 325 **Authors' contributions**

326 - Conception or design of the study: SS-B, NK, JM, XB, RE

327 - Acquisition of data for the study: NK, JM, XB, RE

328 - Analysis of data for the manuscript: SS-B, IS, MP, XB

329 - Interpretation of data for the manuscript: SS-B, AF-S, AP, NK, JM, XB, RE

330 - Drafted the manuscript: SS-B, RE

331 - Revised the manuscript critically for important intellectual content: AF-S, AP, IS, MP, NK,  
332 JM, XB

333 - All the authors have approved the final version of the manuscript AND agree to be  
334 accountable for all aspects of the work in ensuring that questions related to the accuracy or  
335 integrity of any part of the work are appropriately investigated and resolved.

336

### 337 **Acknowledgments**

338 We thank Elaine M. Lilly, PhD, for revising and editing the English text.

339

### 340 **REFERENCES:**

- 341 1. Organization WH. WHO: Air Pollution . 2018. <http://www.who.int/airpollution/en/> .  
342 Accessed Feb 2018.
- 343 2. de F.C. Lichtenfels AJ, van der Plaat DA, de Jong K, van Diemen CC, Postma DS,  
344 Nedeljkovic I, et al. Long-term Air Pollution Exposure, Genome-wide DNA  
345 Methylation and Lung Function in the LifeLines Cohort Study. *Environmental Health*  
346 *Perspectives*. 2018;126:027004.
- 347 3. Plusquin M, Guida F, Polidoro S, Vermeulen R, Raaschou-Nielsen O, Campanella G,  
348 et al. DNA methylation and exposure to ambient air pollution in two prospective  
349 cohorts. *Environment International*. 2017;108:127–36.
- 350 4. Zhong J, Karlsson O, Wang G, Li J, Guo Y, Lin X, et al. B vitamins attenuate the  
351 epigenetic effects of ambient fine particles in a pilot human intervention trial.  
352 *Proceedings of the National Academy of Sciences*. 2017;114:3503–8.
- 353 5. Chi GC, Liu Y, MacDonald JW, Barr RG, Donohue KM, Hensley MD, et al. Long-  
354 term outdoor air pollution and DNA methylation in circulating monocytes: results from  
355 the Multi-Ethnic Study of Atherosclerosis (MESA). *Environmental Health*.  
356 2016;15:119.
- 357 6. Gruzieva O, Xu CJ, Breton C V., Annesi-Maesano I, Antó JM, Auffray C, et al.  
358 Epigenome-wide meta-analysis of methylation in children related to prenatal NO<sub>2</sub>air  
359 pollution exposure. *Environmental Health Perspectives*. 2017;125:104–10.
- 360 7. Goodrich JM, Reddy P, Naidoo RN, Asharam K, Batterman S, Dolinoy DC. Prenatal



- 361 exposures and DNA methylation in newborns: a pilot study in Durban, South Africa.  
362 *Environ Sci: Processes Impacts*. 2016;18:908–17.
- 363 8. Breton C, Gao L, Yao J, Siegmund K, Lurmann F, Gilliland F. Particulate matter, the  
364 newborn methylome, and cardio-respiratory health outcomes in childhood. *Environ*  
365 *Epigenet*. 2016;2:dvw005.
- 366 9. Panni T, Mehta AJ, Schwartz JD, Baccarelli AA, Just AC, Wolf K, et al. Genome-wide  
367 analysis of DNA methylation and fine particulate matter air pollution in three study  
368 populations: KORA F3, KORA F4, and the normative aging study. *Environmental*  
369 *Health Perspectives*. 2016;124:983–90.
- 370 10. Jiang R, Jones MJ, Sava F, Kobor MS, Carlsten C. Short-term diesel exhaust inhalation  
371 in a controlled human crossover study is associated with changes in DNA methylation  
372 of circulating mononuclear cells in asthmatics. *Part Fibre Toxicol*. 2014;11:71.
- 373 11. Grau M, Subirana I, Elosua R, Solanas P, Ramos R, Masiá R, et al. Trends in  
374 cardiovascular risk factor prevalence (1995-2000-2005) in northeastern Spain.  
375 *European journal of cardiovascular prevention and rehabilitation : official journal of*  
376 *the European Society of Cardiology, Working Groups on Epidemiology & Prevention*  
377 *and Cardiac Rehabilitation and Exercise Physiology*. 2007; 653–9.
- 378 12. Beulens JWJ, Monninkhof EM, Monique Verschuren WM, van der Schouw YT, Smit  
379 J, Ocke MC, et al. Cohort profile: The EPIC-NL study. *International Journal of*  
380 *Epidemiology*. 2010;39:1170–8.
- 381 13. Palli D, Berrino F, Vineis P, Tumino R, Panico S, Masala G, et al. A molecular  
382 epidemiology project on diet and cancer: the EPIC-Italy Prospective Study. Design and  
383 baseline characteristics of participants. *Tumori*. 2003;89:586–93.
- 384 14. van Veldhoven K, Polidoro S, Baglietto L, Severi G, Sacerdote C, Panico S, et al.  
385 *Epigenome-wide association study reveals decreased average methylation levels years*

- 386 before breast cancer diagnosis. *Clinical Epigenetics*. 2015;7:67.
- 387 15. Bibikova M, Barnes B, Tsan C, Ho V, Klotzle B, Le JM, et al. High density DNA  
388 methylation array with single CpG site resolution. *Genomics*. 2011; 98:288-95.
- 389 16. Sandoval J, Heyn HA, Moran S, Serra-Musach J, Pujana MA, Bibikova M, et al.  
390 Validation of a DNA methylation microarray for 450,000 CpG sites in the human  
391 genome. *Epigenetics*. 2011;6:692–702.
- 392 17. Sayols-Baixeras S, Subirana I, Lluís-Ganella C, Civeira F, Roquer J, Do A, et al.  
393 Identification and validation of seven new loci showing differential DNA methylation  
394 related to serum lipid profile: an epigenome-wide approach. The REGICOR study.  
395 *Human Molecular Genetics*. 2016;25:4556–65.
- 396 18. Beelen R, Hoek G, Vienneau D, Eeftens M, Dimakopoulou K, Pedeli X, et al.  
397 Development of NO<sub>2</sub> and NO<sub>x</sub> land use regression models for estimating air pollution  
398 exposure in 36 study areas in Europe - The ESCAPE project. *Atmospheric*  
399 *Environment*. 2013;72:10–23.
- 400 19. Eeftens M, Beelen R, De Hoogh K, Bellander T, Cesaroni G, Cirach M, et al.  
401 Development of land use regression models for PM<sub>2.5</sub>, PM<sub>2.5</sub> absorbance, PM<sub>10</sub> and  
402 PM<sub>coarse</sub> in 20 European study areas; Results of the ESCAPE project. *Environmental*  
403 *Science and Technology*. 2012;46:11195–205.
- 404 20. Rivera M, Basagaña X, Aguilera I, Foraster M, Agis D, de Groot E, et al. Association  
405 between long-term exposure to traffic-related air pollution and subclinical  
406 atherosclerosis: The REGICOR study. *Environmental Health Perspectives*. 2013;  
407 121:223–30.
- 408 21. Basagaña X, Aguilera I, Rivera M, Agis D, Foraster M, Marrugat J, et al. Measurement  
409 error in epidemiologic studies of air pollution based on land-use regression models.  
410 *American Journal of Epidemiology*. 2013;178:1342–6.

- 411 22. World Health Organisation. Manual of The MONICA Project. 2000.  
412 <http://www.ktl.fi/publications/monica/manual/index.htm>. Accessed Feb 2018.
- 413 23. Baena-Díez JM, Alzamora-Sas MT, Grau M, Subirana I, Vila J, Torán P, et al.  
414 [Validity of the MONICA cardiovascular questionnaire compared with clinical  
415 records]. *Gaceta sanitaria*. 2010;23:519–25.
- 416 24. Houseman EA, Accomando WP, Koestler DC, Christensen BC, Marsit CJ, Nelson HH,  
417 et al. DNA methylation arrays as surrogate measures of cell mixture distribution. *BMC*  
418 *Bioinformatics*. 2012; 13:86.
- 419 25. Aryee MJ, Jaffe AE, Corrada-Bravo H, Ladd-Acosta C, Feinberg AP, Hansen KD, et  
420 al. Minfi: A flexible and comprehensive Bioconductor package for the analysis of  
421 Infinium DNA methylation microarrays. *Bioinformatics*. 2014;30(10):1363–9.
- 422 26. Jeffrey T. Leek and W. Evan Johnson and Hilary S. Parker and Andrew E. Jaffe and  
423 John D. Storey. sva: Surrogate Variable Analysis. R package version 3.10.0.
- 424 27. Jiang C-L, He S-W, Zhang Y-D, Duan H-X, Huang T, Huang Y-C, et al. Air pollution  
425 and DNA methylation alterations in lung cancer: A systematic and comparative study.  
426 *Oncotarget*. 2017;8:1369–91.
- 427 28. Anto JM, Bousquet J, Akdis M, Auffray C, Keil T, Momas I, et al. Mechanisms of the  
428 Development of Allergy (MeDALL): Introducing novel concepts in allergy  
429 phenotypes. *Journal of Allergy and Clinical Immunology*. 2017; 139:388–99.
- 430 29. Mostafavi N, Vlaanderen J, Portengen L, Chadeau-Hyam M, Modig L, Palli D, et al.  
431 Associations between genome-wide gene expression and ambient nitrogen oxides  
432 (NO<sub>x</sub>). *Epidemiology*. 2017; 28:320-8.
- 433 30. Gref A, Merid SK, Gruzieva O, Ballereau S, Becker A, Bellander T, et al. Genome-  
434 wide interaction analysis of air pollution exposure and childhood asthma with  
435 functional follow-up. *American Journal of Respiratory and Critical Care Medicine*.

- 436 2017;195:1373–83.
- 437 31. Sominen HK, Zhang X, Biagini Myers JM, Kovacic MB, Ulm A, Jurcak N, et al. Ten-  
438 eleven translocation 1 (TET1) methylation is associated with childhood asthma and  
439 traffic-related air pollution. *Journal of Allergy and Clinical Immunology*.  
440 2016;137:797–805.
- 441 32. Hong X, Wang X. Epigenetics and Development of Food Allergy (FA) in Early  
442 Childhood. *Current Allergy and Asthma Reports*. 2014; 14:460.
- 443 33. Janssen BG, Godderis L, Pieters N, Poels K, Kiciński M, Cuypers A, et al. Placental  
444 DNA hypomethylation in association with particulate air pollution in early life. *Particle  
445 and Fibre Toxicology*. 2013;10:22.
- 446 34. Wang T, Garcia JG, Zhang W. Epigenetic Regulation in Particulate Matter-Mediated  
447 Cardiopulmonary Toxicities: A Systems Biology Perspective. *Curr Pharmacogenomics  
448 Person Med*. 2012;10:314–21.
- 449 35. Holloway JW, Savarimuthu Francis S, Fong KM, Yang I a. Genomics and the  
450 respiratory effects of air pollution exposure. *Respirology*. 2012;17:590–600.
- 451 36. Christensen BC, Marsit CJ. Epigenomics in environmental health. *Frontiers in  
452 Genetics*. 2011;2:84.
- 453 37. Cánepa ET, Scassa ME, Ceruti JM, Marazita MC, Carcagno AL, Sirkin PF, et al. INK4  
454 proteins, a family of mammalian CDK inhibitors with novel biological functions.  
455 *IUBMB Life*. 2007; 59:419–26.
- 456 38. van Veelen W, Klompaker R, Gloerich M, van Gasteren CJR, Kalkhoven E, Berger  
457 R, et al. P18 is a tumor suppressor gene involved in human medullary thyroid  
458 carcinoma and pheochromocytoma development. *International journal of cancer*.  
459 2009;124:339–45.
- 460
